# Supplementary material for: ZnO nanorods covered with a TiO2layer: simple sol–gel preparation, and optical, photocatalytic and photoelectrochemical properties
Source: Royal Society of Chemistry journal article supplement (doi:10.1039/c5ta01087j), 2015-01-01
Supplement: c5ta01087j1.pdf [file c5ta01087j1.pdf]

## Electronic Supplementary Information

### ZnO nanorods covered with TiO<sub>2</sub> layer: simple sol-gel preparation, optical, photocatalytic and photoelectrochemical properties

Maciej Kwiatkowski,<sup>a,b,\*</sup> Igor Bezverkhyy,<sup>a</sup> and Magdalena Skompska<sup>b,c</sup>

<sup>a</sup>Laboratoire Interdisciplinaire Carnot de Bourgogne, UMR 6303 CRNS-Université de Bourgogne, 9 avenue Alain Savary, BP 47870-21078, Dijon Cedex, France

<sup>b</sup>Laboratory of Electrochemistry, Faculty of Chemistry, University of Warsaw, Pasteur 1, 02-093 Warsaw, Poland

<sup>c</sup>Biological and Chemical Research Centre, Faculty of Chemistry, University of Warsaw, Zwirki i Wigury 101, 02-089 Warsaw, Poland

\* Corresponding author's e-mail: mkwiatkowski@chem.uw.edu.pl

## 1. Experimental Results

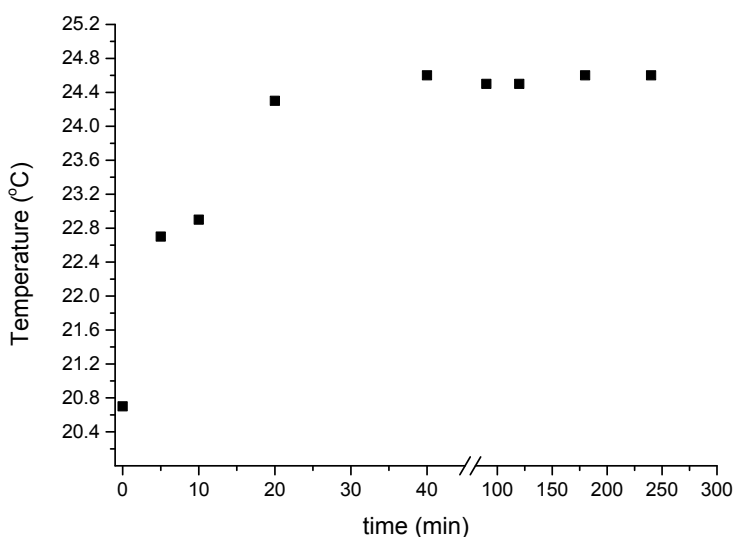

**Fig. S1.** Temperature change over time of aqueous solution in a cuvette placed at fixed distance of 1 cm from LED emitter.

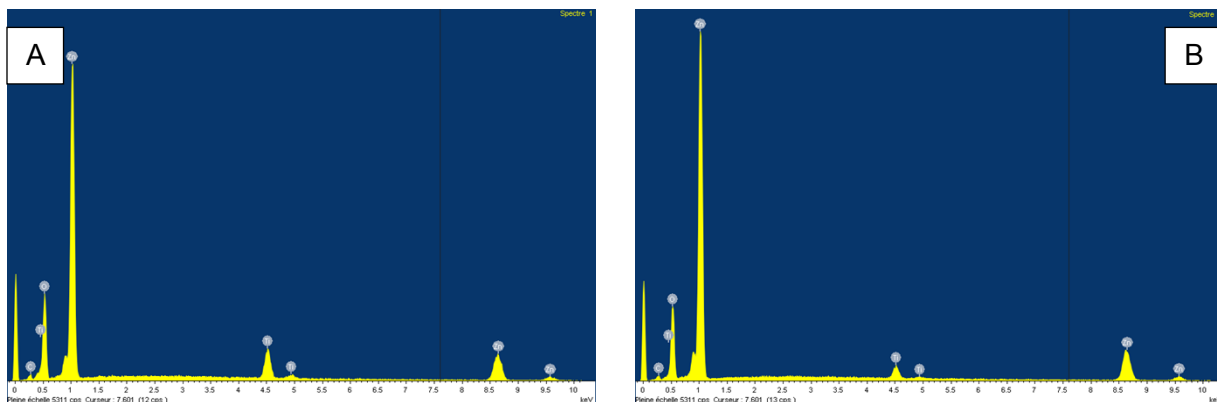

**Fig. S2.** EDX spectra of 3c-30min (a) and 1c-6h (b) samples.

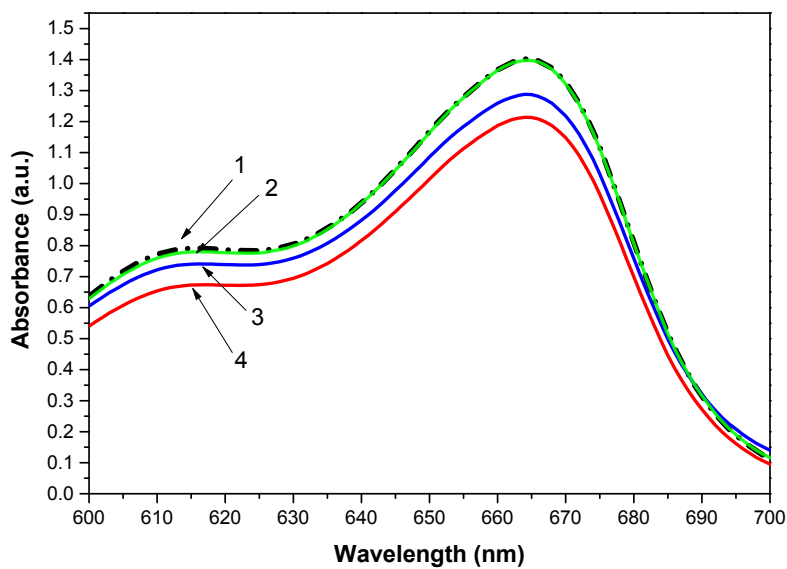

**Fig. S3.** The absorbance spectra of the initial MB conditioning solution (black curve, 1) and after 24 h of MB adsorption on ITO/ZnO (green curve, 2), 3c-30min (blue curve, 3) and 1c-6h (red curve, 4) samples.

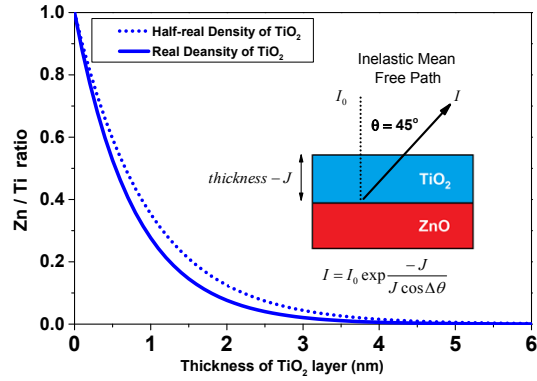

**Fig. S4.** Theoretical Zn/Ti atomic ratios in a function of thickness of TiO<sub>2</sub> layer deposited on ZnO, determined by calculations by means of QUASES-IMFP-TPP2M program. Scheme on the right side of the figure illustrates the basis of the analysis concept.

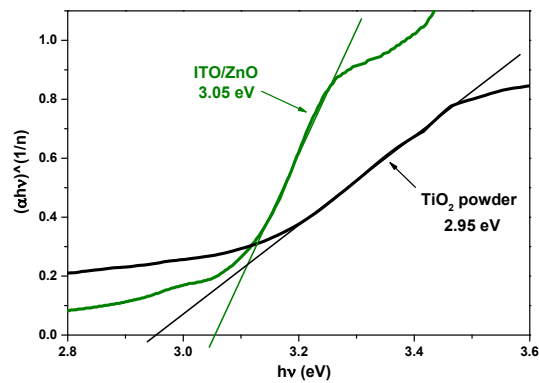

**Fig. S5.**  $(ahv)^{1/n}$  as a function of photon energy ( $h\nu$ ) calculated from diffuse reflectance spectra for determination of optical energy band gaps of the ITO/ZnO and the TiO<sub>2</sub> powder.
